# Supplementary material for: Spermatozoa Transcriptional Response and Alterations in PL Proteins Properties after Exposure of Mytilus galloprovincialis to Mercury
Source: PubMed Central journal article supplement (PMC7915165; doi:10.3390/ijms22041618), 2021-02-05
Supplement: ijms-22-01618-s001.pdf [file ijms-22-01618-s001.pdf]

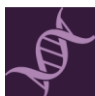

## Supplementary Material

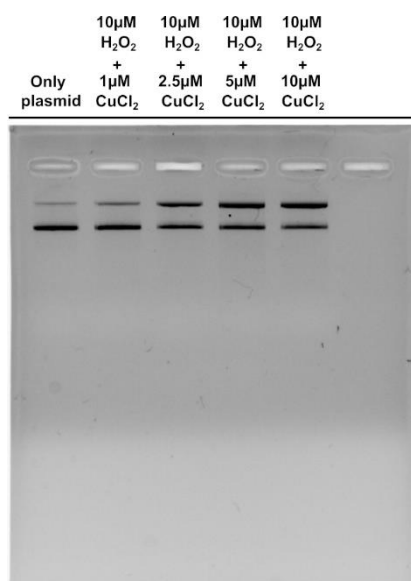

**Figure S1.** Settings of the ideal conditions for pGEM3 plasmid DNA breakage in presence of CuCl<sub>2</sub> and H<sub>2</sub>O<sub>2</sub>.
